# Supplementary material for: Successive high-temperature phase transitions triggered dielectric switching in a one-dimensional hybrid perovskite with blue emission
Source: Royal Society of Chemistry journal article supplement (doi:10.1039/d4ce00415a), 2024-01-01
Supplement: d4ce00415a1.pdf [file d4ce00415a1.pdf]

## Electronic Supplementary Information

### Successive high-temperature phase transitions triggered dielectric switching in a one-dimensional hybrid perovskite with blue emission

Xiu-Ni Hua,<sup>\*a</sup> Zhuoer Cai,<sup>b</sup> Tian-Tian Huang,<sup>a</sup> Jing-Han Cui,<sup>a</sup> Xian Shi,<sup>c</sup> Xiang

Zhang,<sup>a</sup> Yinan Zhang,<sup>b</sup> Jian Chen,<sup>b</sup> Kai Xu<sup>a</sup> and Hai-Bao Duan<sup>\*a</sup>

<sup>a</sup> School of Environmental Science, Nanjing Xiaozhuang University, Nanjing 211171,  
P. R. China

<sup>b</sup> School of Chemistry and Chemical Engineering, Southeast University, Nanjing  
211189, P. R. China

<sup>c</sup> Institute of Advanced Materials, Nanjing Tech University, Nanjing 211816, P. R.  
China

\*E-mail: huaxiuni@njxzc.edu.cn, duanhaibao4660@163.com

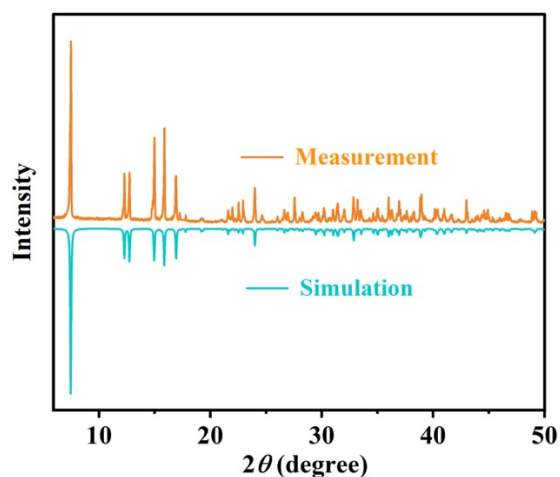

**Fig. S1** Experimental PXRD and simulated patterns from single-crystal data of compound **1** at 293 K.

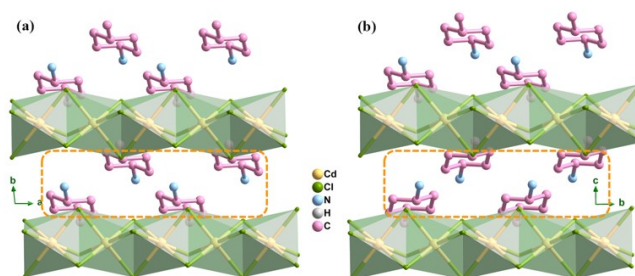

**Fig. S2** Packing diagrams of compound **1** at (a) LTP along the *a*-axis and (b) ITP along the *b*-axis.

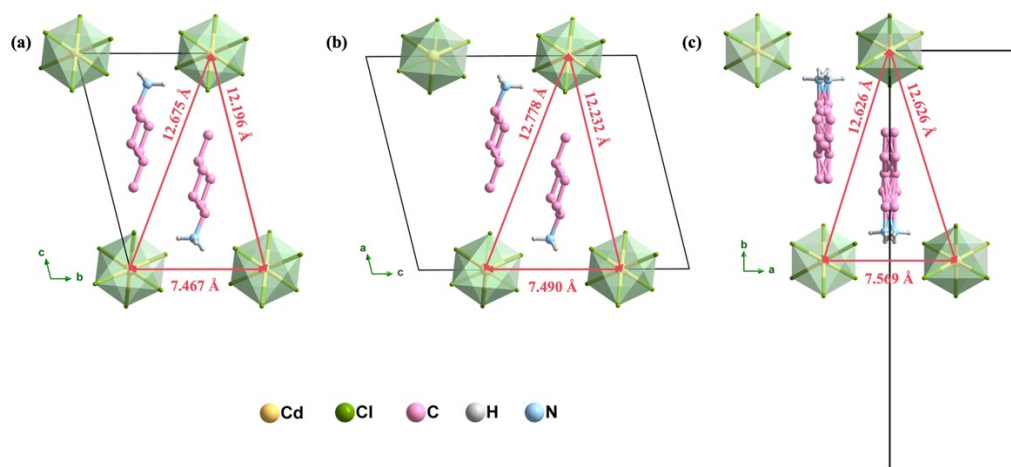

**Fig. S3** Packing diagrams of compound **1** at (a) LTP, (b) ITP and (c) HTP. Hydrogen atoms bonded to C atoms are omitted for clarity.

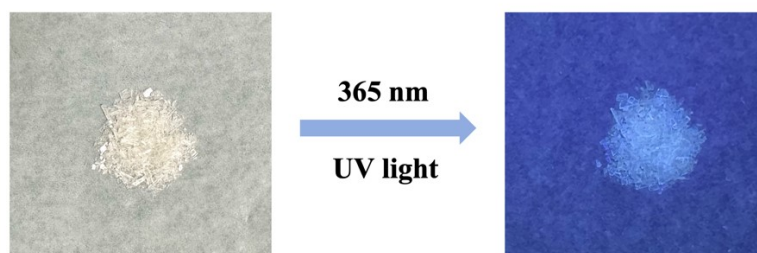

**Fig. S4** The luminescence photos of compound **1** under the UV lamp.

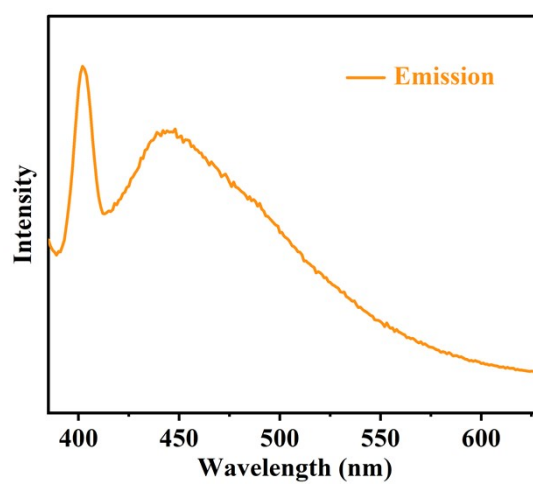

**Fig. S5** PL emission spectra of *trans*-4-methylcyclohexanamine hydrochloride.

**Table S1** Crystal data and structure refinement for compound **1**

|                                           | <b>LTP</b>                                             | <b>ITP</b>                         | <b>HTP</b>                         |                                  |
|-------------------------------------------|--------------------------------------------------------|------------------------------------|------------------------------------|----------------------------------|
| Empirical formula                         | [C <sub>7</sub> H <sub>16</sub> N][CdCl <sub>3</sub> ] |                                    |                                    |                                  |
| Formula weight                            | 332.96                                                 |                                    |                                    |                                  |
| CCDC number                               | 2348074                                                | 2348075                            | 2348076                            | 2348077                          |
| Temperature [K]                           | 293                                                    | 388                                | 400                                | 448                              |
| Crystal system                            | triclinic                                              | monoclinic                         | monoclinic                         | orthorhombic                     |
| Space group                               | <i>P</i> $\bar{1}$                                     | <i>P</i> 2 <sub>1</sub> / <i>c</i> | <i>P</i> 2 <sub>1</sub> / <i>c</i> | <i>Cmcm</i>                      |
| <i>a</i> [Å]                              | 6.6055(7)                                              | 12.229(2)                          | 12.2318(12)                        | 7.5694(14)                       |
| <i>b</i> [Å]                              | 7.4668(10)                                             | 6.6525(11)                         | 6.6515(6)                          | 24.091(4)                        |
| <i>c</i> [Å]                              | 12.1960(16)                                            | 15.025(2)                          | 15.0423(12)                        | 6.6715(12)                       |
| $\alpha$ [°]                              | 103.927(5)                                             | 90                                 | 90                                 | 90                               |
| $\beta$ [°]                               | 90.111(4)                                              | 103.592(6)                         | 103.610(3)                         | 90                               |
| $\gamma$ [°]                              | 95.743(4)                                              | 90                                 | 90                                 | 90                               |
| Volume [Å <sup>3</sup> ]                  | 580.71(13)                                             | 1188.1(4)                          | 1189.47(19)                        | 1216.6(4)                        |
| <i>Z</i>                                  | 2                                                      | 4                                  | 4                                  | 4                                |
| $\rho_{\text{calc}}$ [gcm <sup>-3</sup> ] | 1.904                                                  | 1.861                              | 1.859                              | 1.818                            |
| $\mu$ [mm <sup>-1</sup> ]                 | 2.522                                                  | 2.466                              | 2.463                              | 2.408                            |
| <i>F</i> (000)                            | 328                                                    | 656                                | 656                                | 656                              |
| Goodness-of-fit on F <sup>2</sup>         | 1.043                                                  | 1.042                              | 1.049                              | 1.088                            |
| Final <i>R</i> indexes                    | <i>R</i> <sub>1</sub> = 0.0347                         | <i>R</i> <sub>1</sub> = 0.0309     | <i>R</i> <sub>1</sub> = 0.0356     | <i>R</i> <sub>1</sub> = 0.0326   |
| [ <i>I</i> ≥ 2σ( <i>I</i> )]              | w <i>R</i> <sub>2</sub> = 0.0890                       | w <i>R</i> <sub>2</sub> = 0.0739   | w <i>R</i> <sub>2</sub> = 0.0811   | w <i>R</i> <sub>2</sub> = 0.0853 |
| Final <i>R</i> indexes                    | <i>R</i> <sub>1</sub> = 0.0379                         | <i>R</i> <sub>1</sub> = 0.0401     | <i>R</i> <sub>1</sub> = 0.0503     | <i>R</i> <sub>1</sub> = 0.0370   |
| [all data]                                | w <i>R</i> <sub>2</sub> = 0.0934                       | w <i>R</i> <sub>2</sub> = 0.0806   | w <i>R</i> <sub>2</sub> = 0.0905   | w <i>R</i> <sub>2</sub> = 0.0898 |

**Table S2** Selected bond lengths [Å] and bond angles [°] for compound **1** at 293 K

|                       |           |                       |           |
|-----------------------|-----------|-----------------------|-----------|
| Cd1–Cd2               | 3.3028(4) | Cd1–Cd2 <sup>#1</sup> | 3.3028(4) |
| Cd1–Cl2 <sup>#2</sup> | 2.6396(8) | Cd1–Cl2               | 2.6396(8) |
| Cd1–Cl3               | 2.6664(9) | Cd1–Cl3 <sup>#2</sup> | 2.6664(9) |
| Cd1–Cl1               | 2.6103(8) | Cd1–Cl1 <sup>#2</sup> | 2.6103(8) |
| Cd2–Cl2               | 2.6114(8) | Cd2–Cl2 <sup>#3</sup> | 2.6114(8) |
| Cd2–Cl3 <sup>#3</sup> | 2.6560(8) | Cd2–Cl3               | 2.6560(8) |
| Cd2–Cl1 <sup>#3</sup> | 2.6505(8) | Cd2–Cl1               | 2.6505(8) |
| Cl2–Cd1–Cl3           | 93.64(3)  | Cl2–Cd1–Cl3           | 86.36(3)  |
| Cl1–Cd1–Cl2           | 96.30(3)  | Cl1–Cd1–Cl2           | 83.70(3)  |
| Cl1–Cd1–Cl3           | 95.12(3)  | Cl1–Cd1–Cl3           | 84.88(3)  |
| Cl2–Cd2–Cl3           | 87.15(3)  | Cl2–Cd2–Cl3           | 92.85(3)  |
| Cl2–Cd2–Cl1           | 96.53(3)  | Cl2–Cd2–Cl1           | 83.47(3)  |
| Cl1–Cd2–Cl3           | 84.30(3)  | Cl1–Cd2–Cl3           | 95.70(3)  |

Symmetry transformations used to generate equivalent atoms: #1: -1+X, +Y, +Z;  
#2: 1-X, -Y, -Z; #3: 1+X, +Y, +Z; #4: 2-X, -Y, -Z.

**Table S3** Selected bond lengths [Å] and bond angles [°] for compound **1** at 388 K

|                       |            |                       |            |
|-----------------------|------------|-----------------------|------------|
| Cd1–Cd1 <sup>#1</sup> | 3.3269(6)  | Cd1–Cd1 <sup>#2</sup> | 3.3268(5)  |
| Cd1–Cl1 <sup>#2</sup> | 2.6409(10) | Cd1–Cl1               | 2.6306(10) |
| Cd1–Cl3 <sup>#2</sup> | 2.6823(10) | Cd1–Cl3               | 2.6603(10) |
| Cd1–Cl2 <sup>#1</sup> | 2.6396(10) | Cd1–Cl2               | 2.6258(10) |
| Cl1–Cd1–Cl3           | 96.09(3)   | Cl2–Cd1–Cl1           | 95.65(3)   |
| Cl1–Cd1–Cl3           | 83.95(3)   | Cl2–Cd1–Cl1           | 97.89(3)   |
| Cl1–Cd1–Cl3           | 95.35(3)   | Cl2–Cd1–Cl1           | 83.25(3)   |
| Cl1–Cd1–Cl3           | 84.58(3)   | Cl2–Cd1–Cl3           | 94.92(3)   |
| Cl1–Cd1–Cl2           | 83.19(3)   | Cl2–Cd1–Cl3           | 86.62(3)   |
| Cl2–Cd1–Cl3           | 86.44(3)   | Cl2–Cd1–Cl3           | 92.01(3)   |

---

Symmetry transformations used to generate equivalent atoms: #1: 2-X, -0.5+Y, 0.5-Z; #2: 2-X, 0.5+Y, 0.5-Z.

---

**Table S4** Selected bond lengths [ $\text{\AA}$ ] and bond angles [ $^\circ$ ] for compound **1** at 400 K

---

|                       |            |                       |            |
|-----------------------|------------|-----------------------|------------|
| Cd1–Cd1 <sup>#1</sup> | 3.3264(3)  | Cd1–Cd1 <sup>#2</sup> | 3.3264(3)  |
| Cd1–Cl1               | 2.6280(10) | Cd1–Cl1 <sup>#1</sup> | 2.6386(11) |
| Cd1–Cl3 <sup>#2</sup> | 2.6377(10) | Cd1–Cl3               | 2.6247(10) |
| Cd1–Cl2               | 2.6624(10) | Cd1–Cl2 <sup>#1</sup> | 2.6848(10) |
| Cl1–Cd1–Cl3           | 83.13(3)   | Cl3–Cd1–Cl1           | 97.97(3)   |
| Cl1–Cd1–Cl2           | 84.64(3)   | Cl3–Cd1–Cl1           | 95.70(3)   |
| Cl1–Cd1–Cl2           | 96.02(3)   | Cl3–Cd1–Cl2           | 94.92(3)   |
| Cl1–Cd1–Cl2           | 95.31(3)   | Cl3–Cd1–Cl2           | 92.02(3)   |
| Cl1–Cd1–Cl2           | 83.99(3)   | Cl3–Cd1–Cl2           | 86.63(3)   |

---

Symmetry transformations used to generate equivalent atoms: #1: 2-X, -0.5+Y, 1.5-Z; #2: 2-X, 0.5+Y, 1.5-Z.

---

**Table S5** Selected bond lengths [ $\text{\AA}$ ] and bond angles [ $^\circ$ ] for compound **1** at 448 K

---

|                       |            |                       |            |
|-----------------------|------------|-----------------------|------------|
| Cd1–Cd1 <sup>#1</sup> | 3.3358(6)  | Cd1–Cd1 <sup>#2</sup> | 3.3358(6)  |
| Cd1–Cl2               | 2.6602(7)  | Cd1–Cl2 <sup>#3</sup> | 2.6602(7)  |
| Cd1–Cl2 <sup>#4</sup> | 2.6602(7)  | Cd1–Cl2 <sup>#5</sup> | 2.6602(7)  |
| Cd1–Cl1 <sup>#4</sup> | 2.6229(10) | Cd1–Cl1               | 2.6228(10) |
| Cl2–Cd1–Cl2           | 86.28(3)   | Cl1–Cd1–Cl2           | 96.35(2)   |
| Cl2–Cd1–Cl2           | 93.72(3)   | Cl1–Cd1–Cl2           | 83.65(2)   |

---

Symmetry transformations used to generate equivalent atoms: #1: 1-X, 1-Y, -0.5+Z; #2: 1-X, 1-Y, 0.5+Z; #3: 1-X, 1-Y, 1-Z; #4: +X, 1-Y, -0.5+Z; #5: 1-X, +Y, 1.5-Z.

---
